# Supplementary material for: Comparison of hydration behavior and conformational preferences of the Trp-cage mini-protein in different rigid-body water models
Source: Royal Society of Chemistry journal article supplement (doi:10.1039/c6cp04634g), 2016-01-01
Supplement: c6cp04634g1.pdf [file c6cp04634g1.pdf]

## Electronic Supplementary Information

# Comparison of hydration behavior and conformational preferences of Trp-cage mini-protein in different rigid-body water models

Madhulika Gupta <sup>a</sup>, Divya Nayar <sup>a</sup>, Charusita Chakravarty <sup>‡a</sup> and Sanjoy Bandyopadhyay <sup>\*b</sup>

---

<sup>a</sup>Department of Chemistry, Indian Institute of Technology-Delhi, New Delhi 110016, India.

<sup>‡</sup> Demised

<sup>b</sup> Molecular Modeling Laboratory, Department of Chemistry, Indian Institute of Technology, Kharagpur 721302, India; Tel: +91 3222 283344 ; Tel: +91 3222 283344 ; E-mail: sanjoy@chem.iitkgp.ernet.in

**Table SI-1** Order parameters for temperatures below and above the unfolding transition for Trp-cage solvated with different water models. Extended simulations upto 50 ns are denoted by asterisk.

|          | $T_{Target}$<br>(K) | $\langle T \rangle$<br>(K) | RMSD<br>(Å) | $R_{core}$<br>(Å) | $R_g$<br>(Å) | $N_{nc}$ |
|----------|---------------------|----------------------------|-------------|-------------------|--------------|----------|
| mTIP3P   | 450                 | 449.6                      | 2.6 (0.2)   | 5.2 (0.03)        | 7.5 (0.02)   | 29 (1)   |
|          | 450*                | 449.0                      | 2.6 (0.1)   | 5.3 (0.02)        | 7.5 (0.01)   | 29 (0.2) |
|          | 460                 | 458.9                      | 5.6 (0.5)   | 7.3 (0.3)         | 8.7 (0.2)    | 22 (1)   |
|          | 460*                | 461.9                      | 5.7 (0.4)   | 7.8 (0.3)         | 8.3 (0.1)    | 19(1)    |
| TIP4P    | 460                 | 462.0                      | 2.6 (0.1)   | 5.3 (0.1)         | 7.5 (0.01)   | 29 (0.1) |
|          | 460*                | 464.3                      | 2.6 (0.1)   | 5.3 (0.1)         | 7.5 (0.02)   | 29 (0.1) |
|          | 470                 | 471.4                      | 5.4 (1.0)   | 7.6 (0.9)         | 8.8 (0.5)    | 21 (3)   |
|          | 470*                | 478.2                      | 6.3 (0.4)   | 8.5 (0.4)         | 9.2 (0.2)    | 19 (1)   |
| TIP4P-Ew | 420                 | 417.2                      | 2.4 (0.04)  | 5.1 (0.02)        | 7.5 (0.01)   | 29 (0.1) |
|          | 420*                | 420.3                      | 2.4 (0.03)  | 5.1 (0.01)        | 7.5 (0.01)   | 29 (0.1) |
|          | 430                 | 426.9                      | 7.4 (0.1)   | 8.3 (0.4)         | 9.1 (0.3)    | 14 (1)   |
|          | 430*                | 429.8                      | 7.3 (0.09)  | 8.5 (0.2)         | 9.0 (0.1)    | 15 (1)   |

**Table SI-2** Different order parameters for the variants of U1 state solvated with different water models around 250 K. U1 refers to ensemble averaged values over 20 ns run length while U1\* refers to ensemble averaged values by extending the former run upto 100 ns. U1a and U1b refers to additional unfolded ensembles around 250 K obtained after repetitive quenching from the same initial configuration at respective high temperatures. Helical content is found to be zero for all these states in all the water models.

| Ensemble     | $D_{end}$<br>(Å) | $R_g$<br>(Å)  | RMSD<br>(Å)   | $N_{nc}$      | SASA<br>(Å <sup>2</sup> ) | $R_{core}$<br>(Å) | RMSD <sub>core</sub><br>(Å) | SASA <sub>core</sub><br>(Å <sup>2</sup> ) |              |
|--------------|------------------|---------------|---------------|---------------|---------------------------|-------------------|-----------------------------|-------------------------------------------|--------------|
| mTIP3P       | U1               | 21.5<br>(0.6) | 11.6<br>(0.3) | 9.2<br>(0.2)  | 10<br>(0.2)               | 2636<br>(33)      | 12.1<br>(0.4)               | 10.0<br>(0.4)                             | 1283<br>(6)  |
|              | U1*              | 22.4<br>(0.3) | 11.6<br>(0.1) | 9.2<br>(0.1)  | 10<br>(0.2)               | 2607<br>(10)      | 12.5<br>(0.1)               | 10.4<br>(0.1)                             | 1297<br>(2)  |
|              | U1a              | 20.3<br>(1.6) | 11.6<br>(0.8) | 9.0<br>(0.6)  | 10<br>(0.4)               | 2616<br>(36)      | 13.0<br>(0.9)               | 10.8<br>(1)                               | 1229<br>(7)  |
|              | U1b              | 21.2<br>(1.2) | 11.2<br>(0.3) | 8.9<br>(0.3)  | 15<br>(0.2)               | 2587<br>(17)      | 10.8<br>(0.5)               | 9.1<br>(0.5)                              | 1182<br>(12) |
| TIP4P        | U1               | 19.1<br>(1.6) | 11.9<br>(0.3) | 9.9<br>(0.3)  | 6<br>(0.2)                | 2768<br>(32)      | 12.3<br>(0.3)               | 10.6<br>(0.3)                             | 1296<br>(3)  |
|              | U1*              | 20.6<br>(0.6) | 12.2<br>(0.2) | 9.9<br>(0.1)  | 7<br>(0.1)                | 2823<br>(12)      | 12.5<br>(0.2)               | 10.8<br>(0.2)                             | 1281<br>(3)  |
|              | U1a              | 19.2<br>(0.9) | 12.7<br>(0.3) | 9.9<br>(0.3)  | 8<br>(0.2)                | 2794<br>(26)      | 12.5<br>(0.3)               | 10.5<br>(0.3)                             | 1288<br>(5)  |
|              | U1b              | 23.3<br>(1.2) | 12.2<br>(0.3) | 9.8<br>(0.2)  | 12<br>(1)                 | 2713<br>(25)      | 11.6<br>(0.5)               | 9.9<br>(0.5)                              | 1203<br>(7)  |
| TIP4P<br>-Ew | U1               | 27.0<br>(1)   | 12.9<br>(0.3) | 10.0<br>(0.2) | 3<br>(1)                  | 2819<br>(18)      | 12.9<br>(0.3)               | 10.6<br>(0.3)                             | 1287<br>(3)  |
|              | U1*              | 23.6<br>(1)   | 13.1<br>(0.1) | 10.1<br>(0.2) | 4<br>(2)                  | 2853<br>(10)      | 13.2<br>(0.2)               | 10.9<br>(0.2)                             | 1258<br>(6)  |
|              | U1a              | 24.0<br>(1.4) | 12.4<br>(0.3) | 9.9<br>(0.4)  | 9<br>(0.2)                | 2792<br>(14)      | 13.6<br>(0.4)               | 11.5<br>(0.5)                             | 1295<br>(2)  |
|              | U1b              | 28.7<br>(1)   | 13.0<br>(0.2) | 9.8<br>(0.2)  | 6<br>(0.3)                | 2861<br>(18)      | 13.6<br>(0.2)               | 11.3<br>(0.3)                             | 1300<br>(3)  |
